# Supplementary material for: Functional characterization of the meiosis-specific DNA double-strand break inducing factor SPO-11 from C. elegans
Source: PubMed Central journal article supplement (PMC5443798; doi:10.1038/s41598-017-02641-z), 2017-05-24
Supplement: 41598_2017_2641_MOESM1_ESM.pdf [file 41598_2017_2641_MOESM1_ESM.pdf]

## SUPPLEMENTARY INFORMATION

### **Functional characterization of the meiosis-specific DNA double-strand break inducing factor SPO-11 from *C. elegans***

Hsin-Yi Yeh<sup>1</sup>, Sheng-Wei Lin<sup>2</sup>, Yi-Chun Wu<sup>3</sup>, Nei-Li Chan<sup>4</sup>, and Peter Chi<sup>1,2,\*</sup>

<sup>1</sup> Institute of Biochemical Sciences, National Taiwan University, NO. 1, Section 4, Roosevelt Road, Taipei 10617, Taiwan

<sup>2</sup> Institute of Biological Chemistry, Academia Sinica, 128 Academia Road, Section 2, Nankang, Taipei 11529, Taiwan

<sup>3</sup> Institute of Molecular and Cellular Biology and Department of Life Science, National Taiwan University, NO. 1, Section 4, Roosevelt Road, Taipei 10617, Taiwan

<sup>4</sup> Institute of Biochemistry and Molecular Biology, College of Medicine, National Taiwan University, NO. 1, Sec.1, Ren-Ai Rd., 100, Taipei, Taiwan

\* To whom correspondence should be addressed:

Peter (Hung Yuan) Chi

Address:

Institute of Biochemical Sciences

College of Life Science

National Taiwan University

NO. 1, Sec. 4, Roosevelt Road, Taipei, 10617 Taiwan

Email: [peterhchi@ntu.edu.tw](mailto:peterhchi@ntu.edu.tw)

Phone: 886-2-23665573

Fax: 886-2-23635038

## **Supplementary Methods**

### **Circular dichroism analysis**

Circular dichroism (CD) spectrometry was performed to analyze the conformational change of SPO-11 in a spectropolarimeter (JascoJ-815) under constant N<sub>2</sub> flush. The far-UV CD spectra were measured at 200-250 nm with a 1.0 bandwidth and a 0.2 nm resolution at a scan speed of 20 nm/min using a 1 mm path length quartz cuvette. The SPO-11 was diluted with K buffer (20 mM K<sub>2</sub>HPO<sub>4</sub>, pH 7.5, 0.5 mM EDTA, 10% glycerol, 0.01% Igepal, and 1 mM 2-mercaptoethanol) to the final 10 μM and pre-incubated at 20, 30, or 37°C for 30 min. Then, all CD spectra were collected at 20°C. The spectra were corrected for their respective buffer blanks, and five repetitive scans were averaged.

### **ANS fluorescence analysis**

8-anilino-1-naphthalene sulfonate (ANS) fluorescence is used for analysis of protein structural properties. ANS exhibits intensive fluorescence upon interaction with the hydrophobic regions of a protein, but with low fluorescence intensity in solution. In order to analyze the conformational changes of SPO-11 at different temperatures, the ANS fluorescence was measured in a HITACHI F-4500 fluorescence spectrometer. SPO-11 was diluted with T buffer supplemented with 150 mM KCl to 0.3 mg/ml and pre-incubated with 0.1 mg/ml ANS at 20, 30, or 37°C for 30 min. Fluorescence of ANS was excited at 385 nm, and emission spectra were recorded between 400 and 600 nm at 20°C. The excitation and emission slits widths were fixed at 5 nm. For data evaluation, ANS emission spectra in buffer were subtracted from the corresponding ANS-protein spectra.

## Supplementary Figures

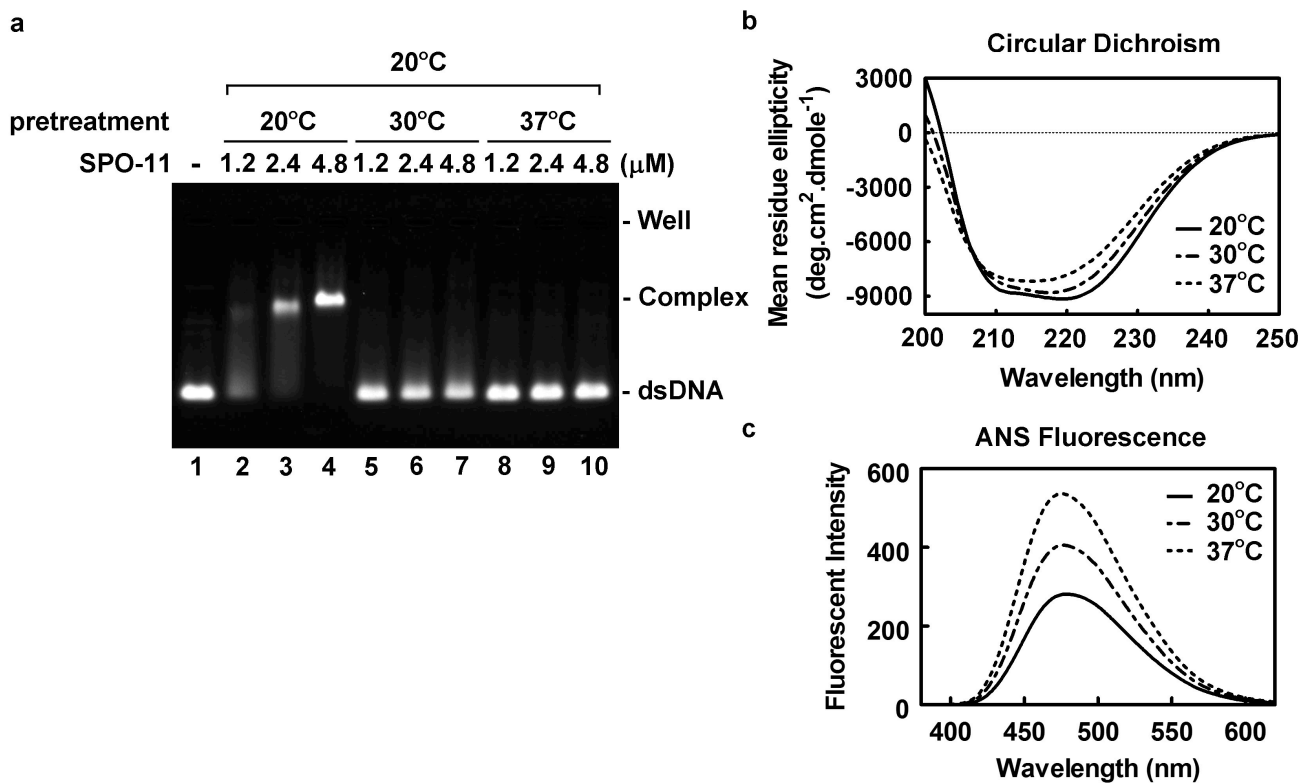

### Supplementary Figure S1. SPO-11 is heat labile.

(a) SPO-11 was pretreated at the indicated temperature for 30 min and then tested for DNA binding at 20°C using the 100 bp dsDNA as substrate. (b) Circular dichroism spectra of SPO-11 at 20, 30, or 37°C. The spectra revealed a significant structural change at the elevated temperatures. (c) The thermal denaturation of SPO-11 was monitored by 8-anilino-1-naphthalene sulfonate (ANS) fluorescence.

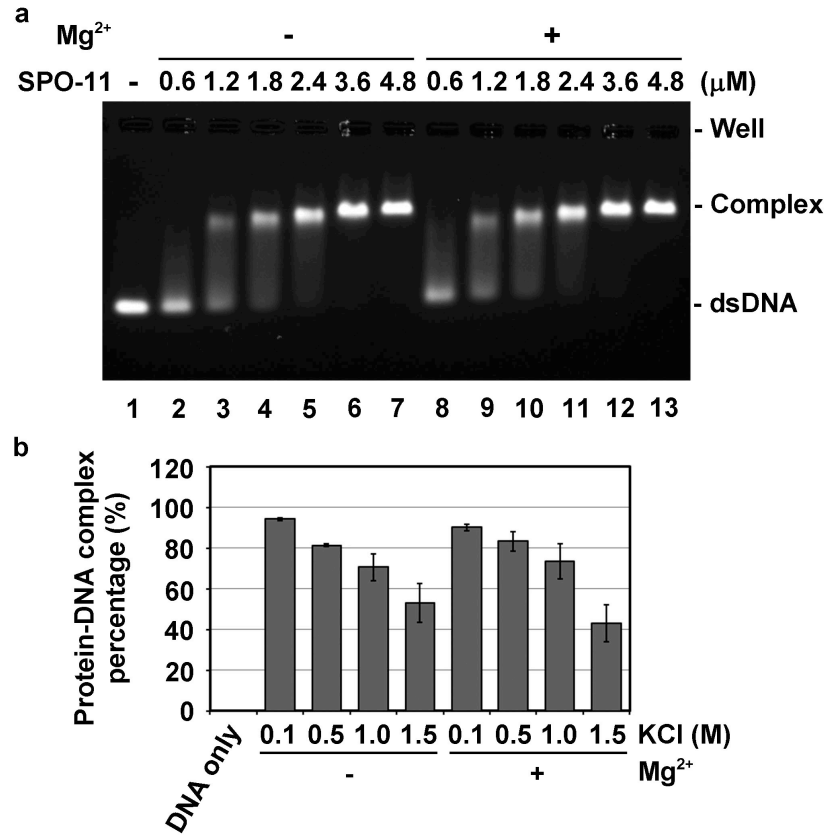

**Supplementary Figure S2. The effect of magnesium on the DNA binding activity of SPO-11.** (a) The indicated concentration of SPO-11 was incubated with the 100 bp dsDNA with or without 10 mM  $Mg^{2+}$ . (b) SPO-11-dsDNA complex was challenged by the indicated concentration of KCl with or without  $Mg^{2+}$  being present. Error bars represent the standard deviation ( $\pm SD$ ) calculated based on at least three independent experiments.

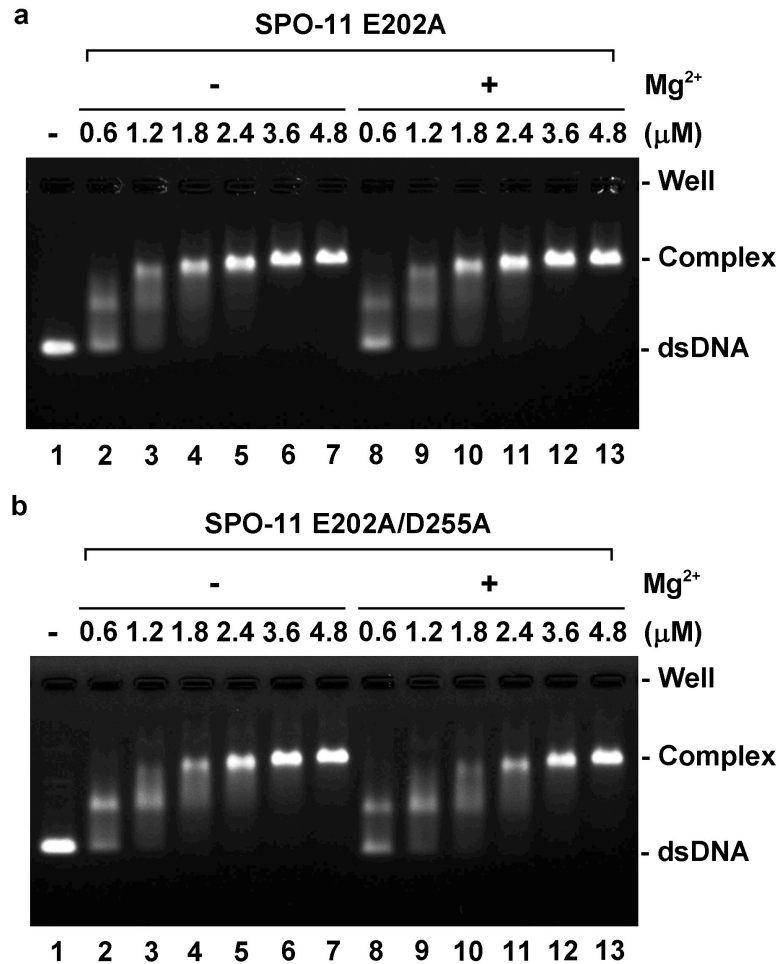

**Supplementary Figure S3. Lack of effect of magnesium on the DNA binding activity of SPO-11 mutant proteins.**

The indicated concentration of SPO-11 E202A (**a**) or E202A/D255A (**b**) was tested for binding of the 100 bp dsDNA with or without the presence of Mg<sup>2+</sup>.

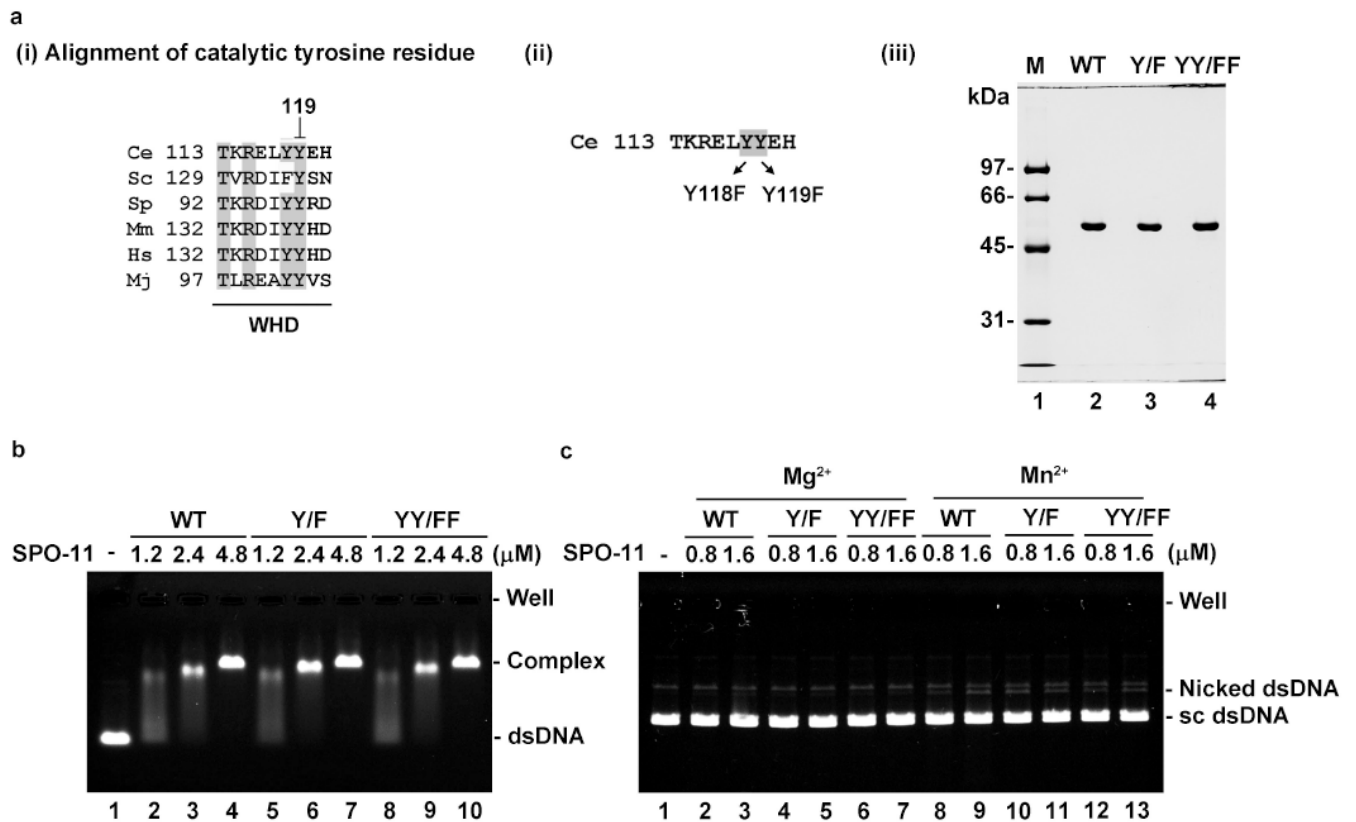

**Supplementary Figure S4. Purification and biochemical characterization of SPO-11 catalytically dead mutant variants.**

(a) (i) Sequence alignment of catalytic tyrosine residues within the winged-helix DNA-binding (WHD) domain of SPO-11 from various species including *C.elegans* (Ce), *S. cerevisiae* (Sc), *S. pombe* (Sp), *M. musculus* (Mm), *H. sapiens* (Hs), and *M. janaschii* (Mj). (ii) *Ce*SPO-11 mutants generated in this study. (iii) Purified wild-type (WT), Y119F (Y/F) and Y118F/Y119F (YY/FF) SPO-11 proteins (1.5  $\mu\text{g}$  each) were analyzed by SDS-PAGE. (b) WT, YF, and YY/FF SPO-11 proteins were tested for DNA binding using the 100 bp dsDNA as substrate. (c) Wild-type and mutant SPO-11 proteins were tested for DNA cleavage with  $\text{Mg}^{2+}$  or  $\text{Mn}^{2+}$  present.
